# Supplementary material for: Hyaluronate–Flt1 peptide conjugate/epirubicin micelles for theranostic application to liver cancers
Source: Royal Society of Chemistry journal article supplement (doi:10.1039/c5ra07464a), 2015-01-01
Supplement: c5ra07464a1.pdf [file c5ra07464a1.pdf]

## Supporting Information

### **Hyaluronate – Flt1 peptide conjugate / epirubicin micelles for theranostic applications to liver cancers**

Ki Su Kim,<sup>a</sup> Seong Woo Hong,<sup>b</sup> Hyemin Kim,<sup>c</sup> Minsoo Cho,<sup>c</sup> Seonghoon Kim,<sup>d</sup> Wonhee Hur,<sup>b</sup>

Seok Hyun Yun,<sup>a</sup> Seung Kew Yoon,<sup>b</sup> and Sei Kwang Hahn<sup>c,\*</sup>

<sup>a</sup> Wellman Center for Photomedicine, Massachusetts General Hospital and Harvard Medical School,  
65 Landsdowne St. UP-525, Cambridge, Massachusetts 02139, USA

<sup>b</sup> Department of Internal Medicine and WHO Collaborating Center of Viral Hepatitis, The Catholic  
University of Korea, 505 Banpo-dong, Seocho-gu, Seoul 137-701, Republic of Korea

<sup>c</sup> Department of Materials Science and Engineering, Pohang University of Science and Technology  
(POSTECH), 77 Cheongam-Ro, Nam-gu, Pohang, Gyeongbuk 790-784, Republic of Korea

<sup>d</sup> Graduate School of Nanoscience and Technology, Korea Advanced Institute of Science and  
Technology, 291 Daehak-ro, Yuseong-gu, Daejeon 305-338, Republic of Korea

**\* Corresponding Author: S.K. Hahn**

Tel: +82 54 279 2159; Fax: +82 54 279 2399; E-mail: skhanb@postech.ac.kr

## Experimental

**The formation of HA-Flt1 peptide conjugates/EPI micelles.** To encapsulate EPI in the HA-Flt1 peptide conjugate micelles, we used the oil in water (O/W) emulsion method. The synthesis and characterization of HA-Flt1 peptide conjugate was described in detail in our previous report.<sup>1</sup> The HA-Flt1 peptide conjugate was dissolved in PBS at a concentration of 2 mg/ml. Then, EPI-HCl (Wako chemical, Japan) was substituted with tetraethylamine to dissolve in chloroform. The concentration of EPI solution was 4 mg/ml. The solutions of HA-Flt1 peptide conjugate and EPI were mixed at a weight ratio of 1 : 2 and sonicated with a tip sonicator for 15 to 20 min in an ice-bath. After finishing sonication, the complex solution stirred overnight to evaporate chloroform. Then, HA-Flt1 peptide conjugate / EPI micelles were filter with a PTFE syringe filter. The final solution was diluted and characterized by DLS (Zetasizer Nano ZS, Malvern Instruments, UK), TEM (Hitachi, Japan), and UV-Vis spectroscopy.

**Intravital microscopy and biodistribution of HA-Flt1 peptide conjugates/EPI micelles.** To investigate the dynamics of micelles in the liver, the intravital real time laser scanning confocal microscopy was carried out after intravenous injection of HA-Flt1 peptide conjugate / EPI micelles to anesthetized Balb/c mice at an age of 7 weeks. After cutting the abdomens, we imaged liver region at systole and diastole in heart using a home built microscope<sup>2</sup> and a water immersion objective lens ( $\times 60$ , Olympus, Japan). The fluorescence of injected HA-pep/micelles was captured with the intravital confocal microscope within 30 min. In addition, the biodistribution analysis of HA-Flt1 peptide conjugate / EPI micelles was carried out in tumor mice model. B16F10 melanoma cells were proliferated and injected subcutaneously in the flank of C57BL/6 mice at an age of 7 weeks. The mice were anesthetized via intraperitoneal injection of a combination of ketamine (100 mg/kg) and xylazine (10 mg/kg). During *in vivo* experiments, the mice were kept under anesthesia, and the body temperature was maintained at 37°C. HA-Flt1 peptide conjugate / EPI micelles were administered to mice at an average age of 7 weeks by tail-vein injection. As a control, the normal mice were also injected with the same amount of HA-Flt1 peptide conjugate / EPI micelles intravenously. After 3 days, both mice were sacrificed for the bio-imaging of their livers, spleens, and kidneys with the image analyser.<sup>3</sup> A halogen lamp with a 625 nm filter was used for the excitation and the fluorescence images were obtained through a 790 nm emission filter. We have complied with the POSTECH institutional ethical use protocols for animals.

**Treatment of hepatocellular carcinoma.** For cancer treatment, The SV40-transgenic mouse was used as a spontaneous hepatocellular carcinoma (HCC) model. The HA-Flt1 peptide conjugate / EPI micelles were intravenously injected to the HCC mice twice a week at a dose of 3 mg/kg of EPI. As a control, we administered the same volume of PBS via intravenous injection. After 4 weeks post-injection, the liver tumor was imaged by MRI. The tumor volume was calculated using the formula  $(\text{length} \times \text{width}^2) / 2$ .

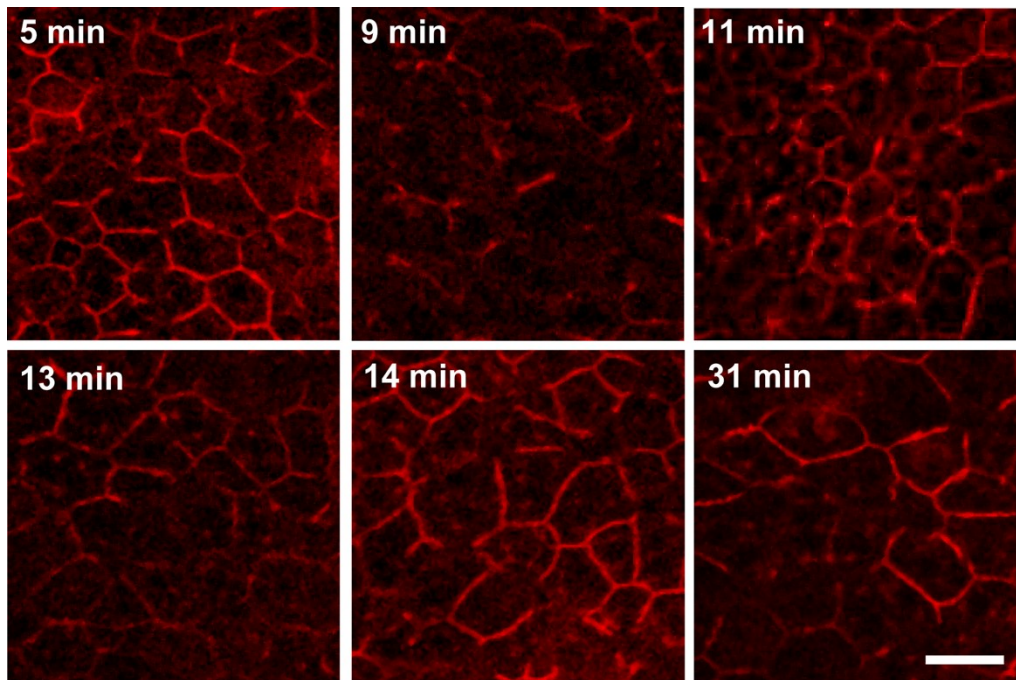

**Figure S1.** The original intravital microscopic images of HA – Flt1 peptide conjugate / EPI micelles in the liver tissue at diastole and systole state of heart (scale bar = 25  $\mu$ m).

## References

1. E. J. Oh, K. Park, J.-S. Choi, C.-K. Joo and S. K. Hahn, *Biomaterials*, 2009, **30**, 6026.
2. K. S. Kim, S. Kim, S. Beack, J.-A. Yang, S. H. Yun and S. K. Hahn, *Nanomedicine: Nanotechnol.*, 2012, **8**, 1070.
3. E. J. Goh, K. S. Kim, Y. R. Kim, H. S. Jung, S. Beack, W. H. Kong, G. Scarcelli, S. H. Yun and S. K. Hahn, *Biomacromolecules*, 2012, **13**, 2554.
